# Supplementary material for: PAM-altering SNP-based allele-specific CRISPR-Cas9 therapeutic strategies for Huntington’s disease
Source: PubMed Central journal article supplement — Mol Ther Methods Clin Dev. 2022 Aug 14;26:547–61. doi: 10.1016/j.omtm.2022.08.005 (PMC9450073; doi:10.1016/j.omtm.2022.08.005), 2022-08-14
Supplement: mmc1.pdf [file mmc1.pdf]

**OMTM, Volume 26**

**Supplemental information**

**PAM-altering SNP-based allele-specific CRISPR-**

**Cas9 therapeutic strategies for Huntington's disease**

**Jun Wan Shin, Eun Pyo Hong, Seri S. Park, Doo Eun Choi, Sophia Zeng, Richard Z. Chen, and Jong-Min Lee**

**Table S1. Summary of polymorphic PAS in the analysis region.**

224 PAS in the region (chr4:3056408-3116408; GRCh37/hg19) were polymorphic in 8,543 HD participants. For those 224 PAS, PAM-generating alleles (PGA) are grouped based on the allele and strand. Both reference and alternative alleles of 5 PAS generate the NGG PAM sites. In addition, two alternative alleles of one PAS generate PAM sites. Therefore, we identified 230 PGAs from 223 bi-allele SNPs and 1 multi-allele SNP in the region.

| PAM-generating allele (PGA)                                                    | Frequency |
|--------------------------------------------------------------------------------|-----------|
| Reference allele on the plus strand                                            | 59        |
| Reference allele on the minus strand                                           | 73        |
| Alternative allele on the plus strand                                          | 49        |
| Alternative allele on the minus strand                                         | 39        |
|                                                                                |           |
| Reference allele on the plus strand and alternative allele on the minus strand | 1         |
| Reference allele on the minus strand and alternative allele on the plus strand | 4         |

**Table S2. The mutant specificities of 230 PGAs from 224 polymorphic PAS.**

Information of 230 PGAs from 224 PAS are shown. Genomic coordinate (BP, base pair) was based on GRCh37/hg19. PGA represents NGG PAM-generating allele. 'G' and 'C' alleles generate the NGG PAM sequence on the plus and minus strand, respectively. The frequency of PGA was based on 8,543 HD subjects. To evaluate the applicability of each PAS in the allele-specific CRISPR-Cas9, we calculated the proportions of HD subjects who carry the PAM site on the mutant *HTT*, normal *HTT*, both, or neither. The proportion of HD subjects who carry mutant-specific PAM sites for a given PAS represents the mutant specificity for that PAS.

**Table S3. Predicted off-targets and experimental validation.**

In order to evaluate the levels of off-target effects, we predicted potential off-targets using Cas-Offinder. Based on the PAM site generated by the corresponding PAS, a gRNA (20 nucleotide) was designed for each PAS.

A) Names and sequences of test gRNAs are shown in the second and third columns, respectively. L and R represent the left and right side of the transcription start site, respectively. Off-target prediction was based on 0, 1, 2, and 3 mismatches. \$, on-target (i.e., *HTT*). &, one on-target and one off-target. The gRNA with 0 predicted targets with 0 mismatch for L2 was due to the fact that the alternative allele at this location generates the PAM site. Sites with yellow highlight represent candidate targets, and were therefore further validated by MiSeq analysis (see below).

B) Subsequently, we treated a patient-derived iPSC and performed MiSeq analysis to experimentally validate the predicted off-targets of L4, R4, and R6. We focused on predicted off-targets that are located in the exons of protein-coding genes because off-targeting at intergenic regions or introns may have minimal impacts. Five, one, and one exonic off-targets were predicted for L4, R4, and R6, respectively; all predicted off-targets carry 3 mismatches. #, off-targeting potentially due to sequencing errors caused by repetitive sequences. Genomic location was based on GRCh38.

| A. Predicted off-targets |      |                        |            |            |              |              |
|--------------------------|------|------------------------|------------|------------|--------------|--------------|
| PAS                      | gRNA | gRNA sequence          | 0 mismatch | 1 mismatch | 2 mismatches | 3 mismatches |
| rs1313769                | L1   | GGCAGAGCTTGCAGTGAGCT   | 31         | 581        | > 1000       | > 1000       |
| rs1313774                | L2   | GCATATAATCAAGAAATAAT   | 0          | 7          | 9            | 41           |
| rs12506200               | L3   | CAGGCATGAGCCAGCATGCC   | 80         | > 1000     | > 1000       | > 1000       |
| rs2857935                | L4   | CCCGCTCCAGGCGTCGGCGG   | 1 \$       | 0          | 0            | 13           |
| rs28820097               | R1   | CAACAACATAAAAGCACAAACA | 1 \$       | 0          | 7            | 70           |
| rs7659144                | R2   | CCCATGGGCCATGTGGAAAT   | 1 \$       | 0          | 1            | 12           |
| rs7688390                | R3   | AGAATGGACATCATAAAGAT   | 1 \$       | 0          | 0            | 26           |
| rs16843804               | R4   | GTCGATGATCTCTTTAACCG   | 1 \$       | 0          | 0            | 6            |
| rs6828615                | R5   | TGGGCTCACGCCTGTAATCC   | 2 &        | 42         | > 1000       | > 1000       |
| rs16843836               | R6   | GCTATGTTTATCCTGCAACC   | 1 \$       | 0          | 0            | 5            |

| B. Experimental validation of the predicted off-targets on exons |      |                         |                 |                  |            |
|------------------------------------------------------------------|------|-------------------------|-----------------|------------------|------------|
| PAS                                                              | gRNA | Off-target location     | # of mismatches | Type of sequence | Percentage |
| rs2857935                                                        | L4   | chr20:21396423-21396445 | 3               | Modified         | 0.9 #      |
|                                                                  |      |                         |                 | Unmodified       | 99.1       |
|                                                                  |      | chr20:51003962-51003984 | 3               | Modified         | 0          |
|                                                                  |      |                         |                 | Unmodified       | 100        |
|                                                                  |      | chr19:1084312-1084334   | 3               | Modified         | 0          |
|                                                                  |      |                         |                 | Unmodified       | 100        |
|                                                                  |      | chr7:7969448-7969470    | 3               | Modified         | 0.4 #      |
|                                                                  |      |                         |                 | Unmodified       | 99.6       |
| chr10:101131872-101131894                                        | 3    | Modified                | 4.3 #           |                  |            |
|                                                                  |      | Unmodified              | 95.7            |                  |            |
| rs16843804                                                       | R4   | chr10:77985187-77985209 | 3               | Modified         | 0          |
|                                                                  |      |                         |                 | Unmodified       | 100        |
| rs16843836                                                       | R6   | chr1:39387262-39387284  | 3               | Modified         | 0          |
|                                                                  |      |                         |                 | Unmodified       | 100        |

**Table S4. Selective expression of normal *HTT* mRNA in the targeted clonal lines.**

We performed MiSeq analysis of cDNA from total RNA using a primer set to quantify alleles at rs363099, which is heterozygous in the HD subjects with the most frequent diplotype. Mutant and normal *HTT* carry C and T allele at this location, respectively. Based on the allele at rs363099, we calculated the expression levels of mutant and normal *HTT* mRNA in each of the targeted clones. # of reads and percent values represent the number of MiSeq sequence reads and the relative proportion of corresponding allelic expression.

| Cell   | gRNA pair | Clonal line | Allele | MiSeq of cDNA         |     |
|--------|-----------|-------------|--------|-----------------------|-----|
|        |           |             |        | Number sequence reads | %   |
| iPSC-A | L4-R4     | 1           | Mutant | 0                     | 0   |
|        |           |             | Normal | 69,732                | 100 |
|        |           | 2           | Mutant | 0                     | 0   |
|        |           |             | Normal | 69,169                | 100 |
|        |           | 3           | Mutant | 0                     | 0   |
|        |           |             | Normal | 66,331                | 100 |
|        |           | 4           | Mutant | 0                     | 0   |
|        |           |             | Normal | 33,385                | 100 |
|        |           | 5           | Mutant | 0                     | 0   |
|        |           |             | Normal | 75,267                | 100 |
|        | L4-R6     | 1           | Mutant | 0                     | 0   |
|        |           |             | Normal | 67,713                | 100 |
|        |           | 2           | Mutant | 0                     | 0   |
|        |           |             | Normal | 80,816                | 100 |
|        |           | 3           | Mutant | 0                     | 0   |
|        |           |             | Normal | 100,832               | 100 |
|        |           | 4           | Mutant | 0                     | 0   |
|        |           |             | Normal | 62,525                | 100 |
|        |           | 5           | Mutant | 0                     | 0   |
|        |           |             | Normal | 72,609                | 100 |
| iPSC-B | L4-R4     | 1           | Mutant | 0                     | 0   |
|        |           |             | Normal | 58,789                | 100 |
|        |           | 2           | Mutant | 0                     | 0   |
|        |           |             | Normal | 73,195                | 100 |
|        |           | 3           | Mutant | 0                     | 0   |
|        |           |             | Normal | 47,992                | 100 |
|        |           | 4           | Mutant | 0                     | 0   |
|        |           |             | Normal | 67,098                | 100 |
|        |           | 5           | Mutant | 0                     | 0   |
|        |           |             | Normal | 61,895                | 100 |
|        | L4-R6     | 1           | Mutant | 0                     | 0   |
|        |           |             | Normal | 64,061                | 100 |
|        |           | 2           | Mutant | 0                     | 0   |
|        |           |             | Normal | 74,280                | 100 |
|        |           | 3           | Mutant | 0                     | 0   |
|        |           |             | Normal | 49,121                | 100 |
|        |           | 4           | Mutant | 0                     | 0   |
|        |           |             | Normal | 52,415                | 100 |
|        |           | 5           | Mutant | 0                     | 0   |
|        |           |             | Normal | 51,208                | 100 |

**Table S5. Mutant specificity of TP-CRISPR strategies using two allele-specific gRNAs.**

Since allele-specific TP-CRISPR strategies to prevent the expression of the mutant *HTT* require the use of two gRNAs simultaneously, we computed the levels of mutant specificity (i.e., the percentage of HD subjects who are eligible for a given mutant *HTT*-specific approach) of different gRNA combinations focusing on 10 candidate PAS. PAS on the rows and columns represent PAS upstream and downstream of the TSS, respectively. For example, the mutant specificity of L4-R4 combination was calculated by counting HD subjects who carry the NGG PAM site only on the mutant *HTT* at rs2857935 and rs16843804, revealing that 27% of HD subjects carry the PAM sites at both locations of the mutant *HTT*. Numbers in parentheses represent the mutant specificity of individual PAS in the same HD subjects.

| gRNA                   | R1         | R2        | R3        | R4         | R5        | R6         |
|------------------------|------------|-----------|-----------|------------|-----------|------------|
| PAS                    | rs28820097 | rs7659144 | rs7688390 | rs16843804 | rs6828615 | rs16843836 |
| (mutant specificity %) | (14.8)     | (32.5)    | (10.9)    | (28.7)     | (10.9)    | (28.7)     |
| L1                     | 4.9        | 22.9      | 1.2       | 22.2       | 1.2       | 22.2       |
| rs1313769              |            |           |           |            |           |            |
| (38.4)                 |            |           |           |            |           |            |
| L2                     | 4.9        | 22.9      | 1.2       | 22.2       | 1.2       | 22.2       |
| rs1313774              |            |           |           |            |           |            |
| (38.5)                 |            |           |           |            |           |            |
| L3                     | 0.8        | 2.7       | 8.4       | 1.1        | 8.4       | 1.1        |
| rs12506200             |            |           |           |            |           |            |
| (15.9)                 |            |           |           |            |           |            |
| L4                     | 0.1        | 26.9      | 0         | 27         | 0         | 27         |
| rs2857935              |            |           |           |            |           |            |
| (27.6)                 |            |           |           |            |           |            |

**Table S6. Cumulative mutant specificities of TP-CRISPR strategies using one allele-specific and one non-allele-specific gRNAs.**

In order to identify a set of gRNAs and target sites that can be applied to the maximum number of HD subjects for allele-specific TP-CRISPR targeting, we calculated cumulative mutant specificity by 10 iterations of identification of target population and re-calculation of the mutant specificity. Since simultaneous use of one allele-specific and one non-allele-specific gRNA may lead to allele-specific CRISPR editing, we calculated cumulative mutant specificity based on a single allele-specific gRNA approach. The third column shows cumulative mutant specificity. For example, three allele-specific TP-CRISPR strategies based on rs1313774, rs12506200, and rs568806386 (iteration 3) can be applied to at least ~60% of HD subjects. To identify alternative targets, linkage disequilibrium (LD) was calculated for the selected target SNP based on genotypes of 8,543 HD subjects; we took the top 5 PAS with the highest LD values (numbers below PAS).

| Iteration | PAS         | Cumulative mutant specificity (%) | Alternative target 1 | Alternative target 2 | Alternative target 3 | Alternative target 4 | Alternative target 5 |
|-----------|-------------|-----------------------------------|----------------------|----------------------|----------------------|----------------------|----------------------|
|           |             |                                   | LD                   | LD                   | LD                   | LD                   | LD                   |
| 1         | rs1313774   | 38.44                             | rs1313769            | rs2857935            | rs16843804           | rs16843836           | rs7659144            |
|           |             |                                   | 0.9974               | 0.3243               | 0.2868               | 0.2859               | 0.2412               |
| 2         | rs12506200  | 50.59                             | rs13141939           | rs13102260           | rs7688390            | rs6828615            | rs35342954           |
|           |             |                                   | 0.4149               | 0.4003               | 0.3043               | 0.3022               | 0.2875               |
| 3         | rs568806386 | 59.73                             | rs28820097           | rs762855             | rs2285086            | rs6446722            | rs2024115            |
|           |             |                                   | 0.0038               | 0.0025               | 0.002                | 0.002                | 0.0018               |
| 4         | rs574984731 | 66.59                             | rs187490343          | rs916170             | rs28820097           | rs1313774            | rs1313769            |
|           |             |                                   | 0.902                | 0.0063               | 0.0026               | 0.0009               | 0.0009               |
| 5         | rs186788713 | 69.31                             | rs28820097           | rs1313774            | rs1313769            | rs184373685          | rs193177768          |
|           |             |                                   | 0.002                | 0.001                | 0.001                | 0.0007               | 0.0007               |
| 6         | rs61792502  | 70.21                             | rs61792500           | rs61792503           | rs61792505           | rs61792472           | rs56794194           |
|           |             |                                   | 0.9983               | 0.9915               | 0.9865               | 0.9665               | 0.8475               |
| 7         | rs551562237 | 71.07                             | rs73191179           | rs28820097           | rs2857935            | rs16843836           | rs16843804           |
|           |             |                                   | 0.0009               | 0.0002               | 0.0002               | 0.0002               | 0.0002               |
| 8         | rs7693317   | 71.75                             | rs7693317            | rs10016755           | rs28652828           | rs28660254           | rs80093929           |
|           |             |                                   | 1                    | 1                    | 1                    | 1                    | 0.9788               |
| 9         | rs13102260  | 72.17                             | rs13141939           | rs35342954           | rs35631490           | rs13122415           | rs13132932           |
|           |             |                                   | 0.8983               | 0.6406               | 0.5061               | 0.5019               | 0.4939               |
| 10        | rs7659144   | 72.49                             | rs55962025           | rs2024115            | rs16843804           | rs16843836           | rs2857935            |
|           |             |                                   | 0.9341               | 0.8053               | 0.7662               | 0.7651               | 0.7591               |

**Figure S1. Distributions of mutant specificities of polymorphic PAS.**

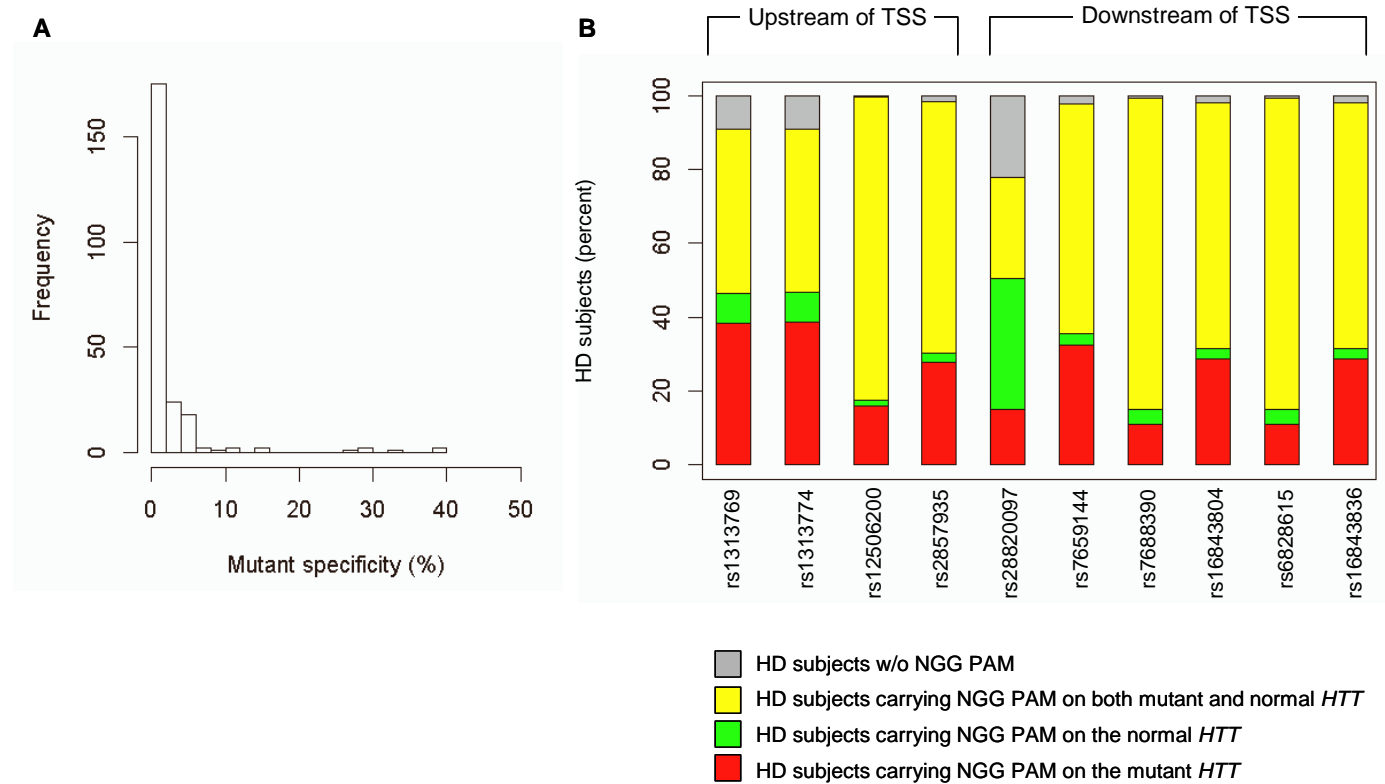

A) The levels of mutant specificity (i.e., percentage of HD subjects who carry the PAM site only on the mutant *HTT*) (X-axis) of 230 PGAs from 224 polymorphic PAS are summarized.

B) By applying the 10% mutant specificity threshold, we identified 10 PAS that show relatively high levels of mutant specificities. For each PAS, the percentages of HD subjects who carry the PAM site 1) only on the mutant *HTT* (red; mutant specificity), 2) only on the normal *HTT* (green), 3) on both mutant and normal *HTT* (yellow), and 4) on none of mutant and normal *HTT* (grey) are summarized.



**Figure S2. Allele-specific TP-CRISPR strategies based on combinations of two PAS.**

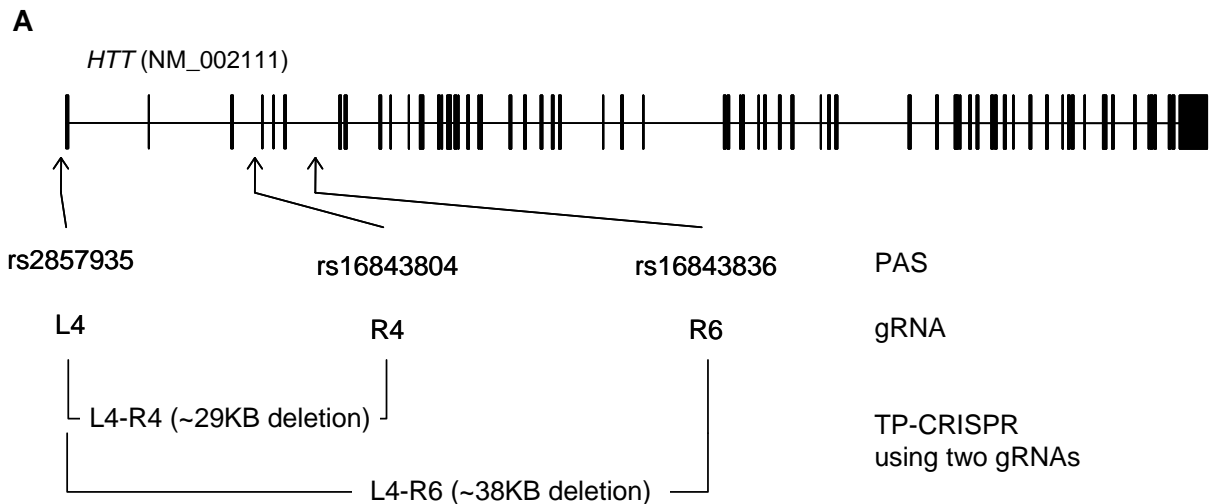

**B**

| HD-derived iPSC    | CRISPR-Cas9 treatment | Number of independent clones |
|--------------------|-----------------------|------------------------------|
| iPSC-A<br>(46 CAG) | EV                    | 6                            |
|                    | TP-CRISPR : L4-R4     | 5                            |
|                    | TP-CRISPR : L4-R6     | 5                            |
| iPSC-B<br>(42 CAG) | EV                    | 6                            |
|                    | TP-CRISPR : L4-R4     | 5                            |
|                    | TP-CRISPR : L4-R6     | 5                            |

↓  
DNA, RNA, and protein analysis

A) Based on the transfection and MiSeq analysis, we identified 3 target PAS and gRNAs that showed high allele specificities and relatively good editing efficiencies. To further evaluate TP-CRISPR strategies using those 3 candidate PAS, we treated patient-derived iPSC lines with empty vector (EV) or two different combinations of gRNAs. The gRNA L4 was designed based on the PAM site generated by rs2857935, which showed 27.6% mutant specificity. This gRNA targets the left side of the transcription start site, and is therefore used for both combinations. The gRNAs R4 and R6 were designed based on PAM sites respectively generated by rs16843804 and rs16843836, which are located downstream of the TSS. L4-R4 and L4-R6 combinations were expected to excise approximately 29KB and 38KB from the mutant *HTT* in our representative HD iPSC lines carrying the most frequent diplotype.

B) Two independent HD iPSC lines were treated with empty vector (EV), L4-R4 or L4-R6 gRNA combinations. Subsequently, we established 20 targeted and 12 empty vector treated clonal lines for subsequent characterization.

**Figure S3. The lack of re-integration of the excised region in the targeted clonal lines by allele-specific TP-CRISPR.**

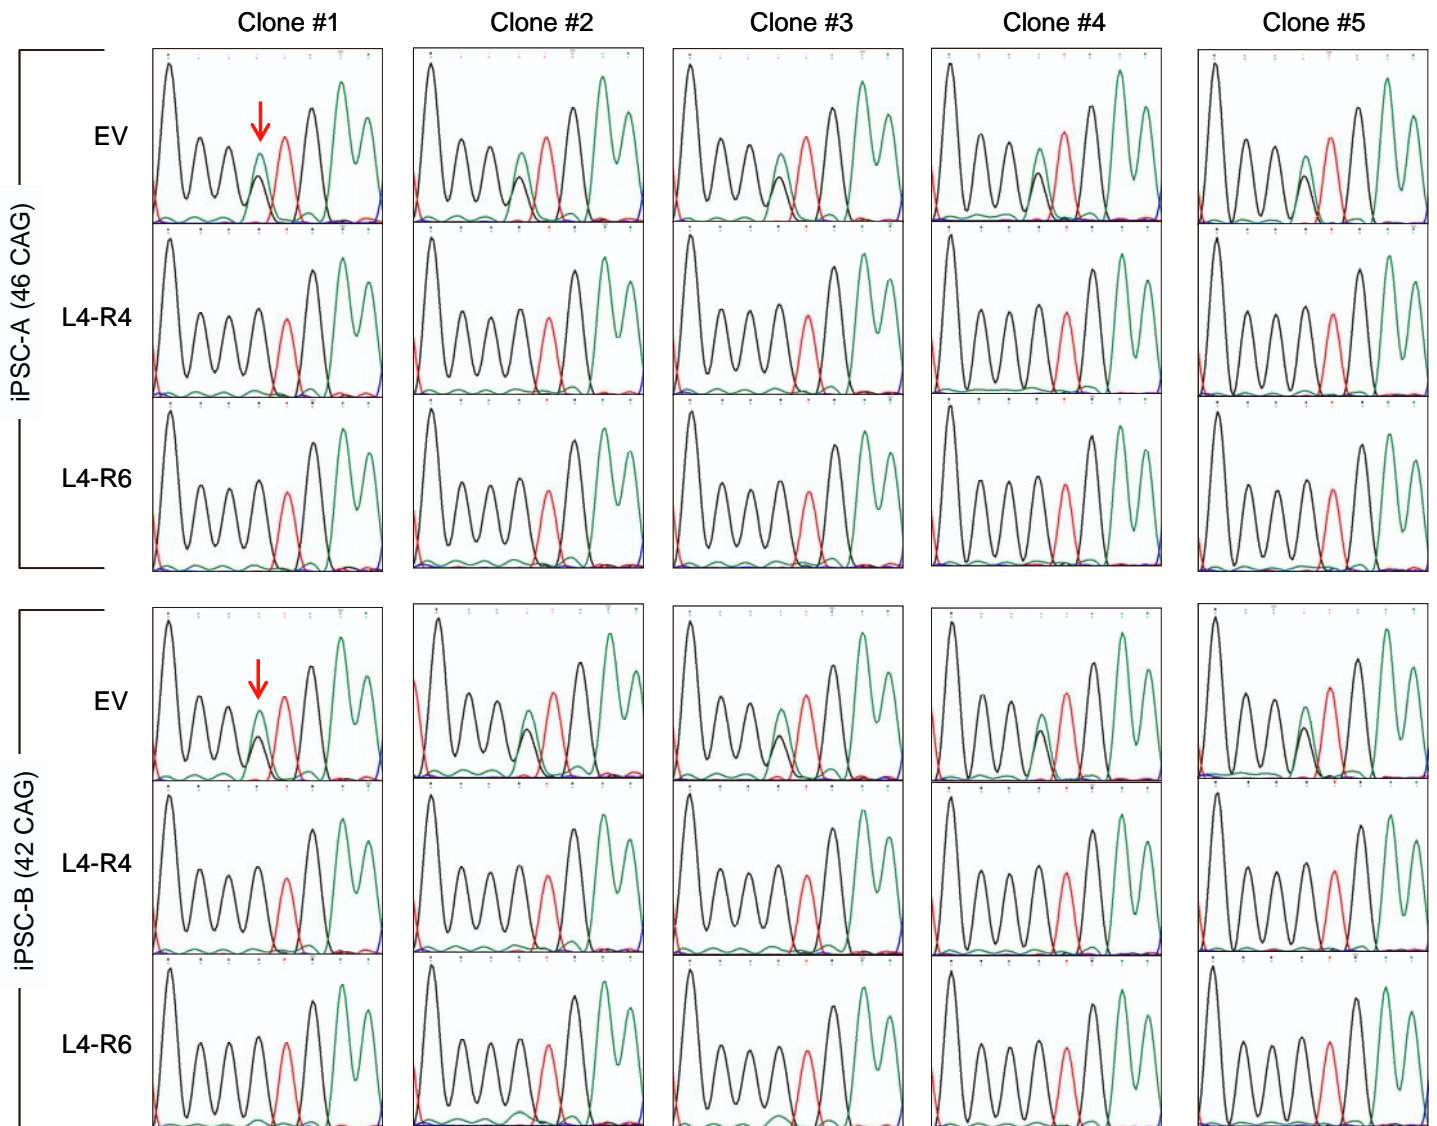

To determine whether the excised DNA region got integrated into the genome elsewhere, we performed DNA PCR and Sanger sequencing analysis focusing on determining the genotype at rs2285086 (red arrows), which is located in the middle of the excised region. Heterozygous genotype shown in the empty vector-treated clones (EV) indicates the presence of mutant and normal *HTT*. The loss of heterozygosity and signals for 'G' allele at rs2285086 (red arrows) in the targeted clonal lines refute the integration of excised mutant DNA in the genome. All 20 independent targeted clones from iPSC-A (A) and iPSC-B (B) confirmed the loss of heterozygosity, actually meaning hemizygosity.

Figure S4. Mutant *HTT*-specific TP-CRISPR does not produce exon 1 huntingtin protein.

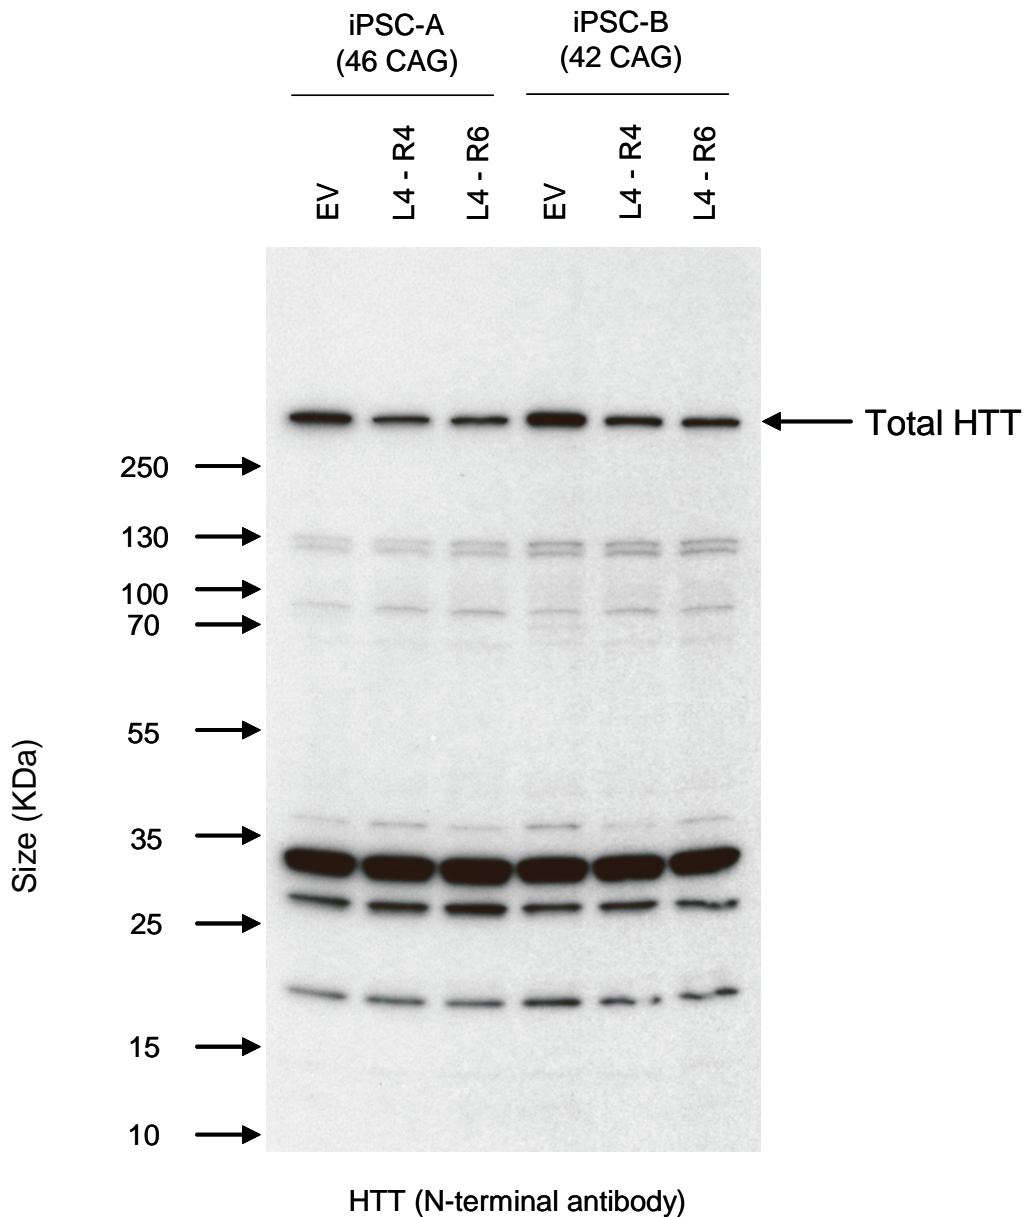

To determine whether excision of DNA (involving TSS and expanded CAG repeat) from the mutant *HTT* resulted in the production of exon 1 huntingtin protein, we analyzed whole cell lysate from EV-treated and targeted clonal lines by immunoblot analysis. We ran gels for 1 hr to retain small molecular weight proteins. Transferred membranes were probed using N-terminal antibody (N17). The size of exon1 fragment protein with 46 and 42 glutamines is approximately 12kDa.

**Figure S5. ASE analysis of RNAseq data.**

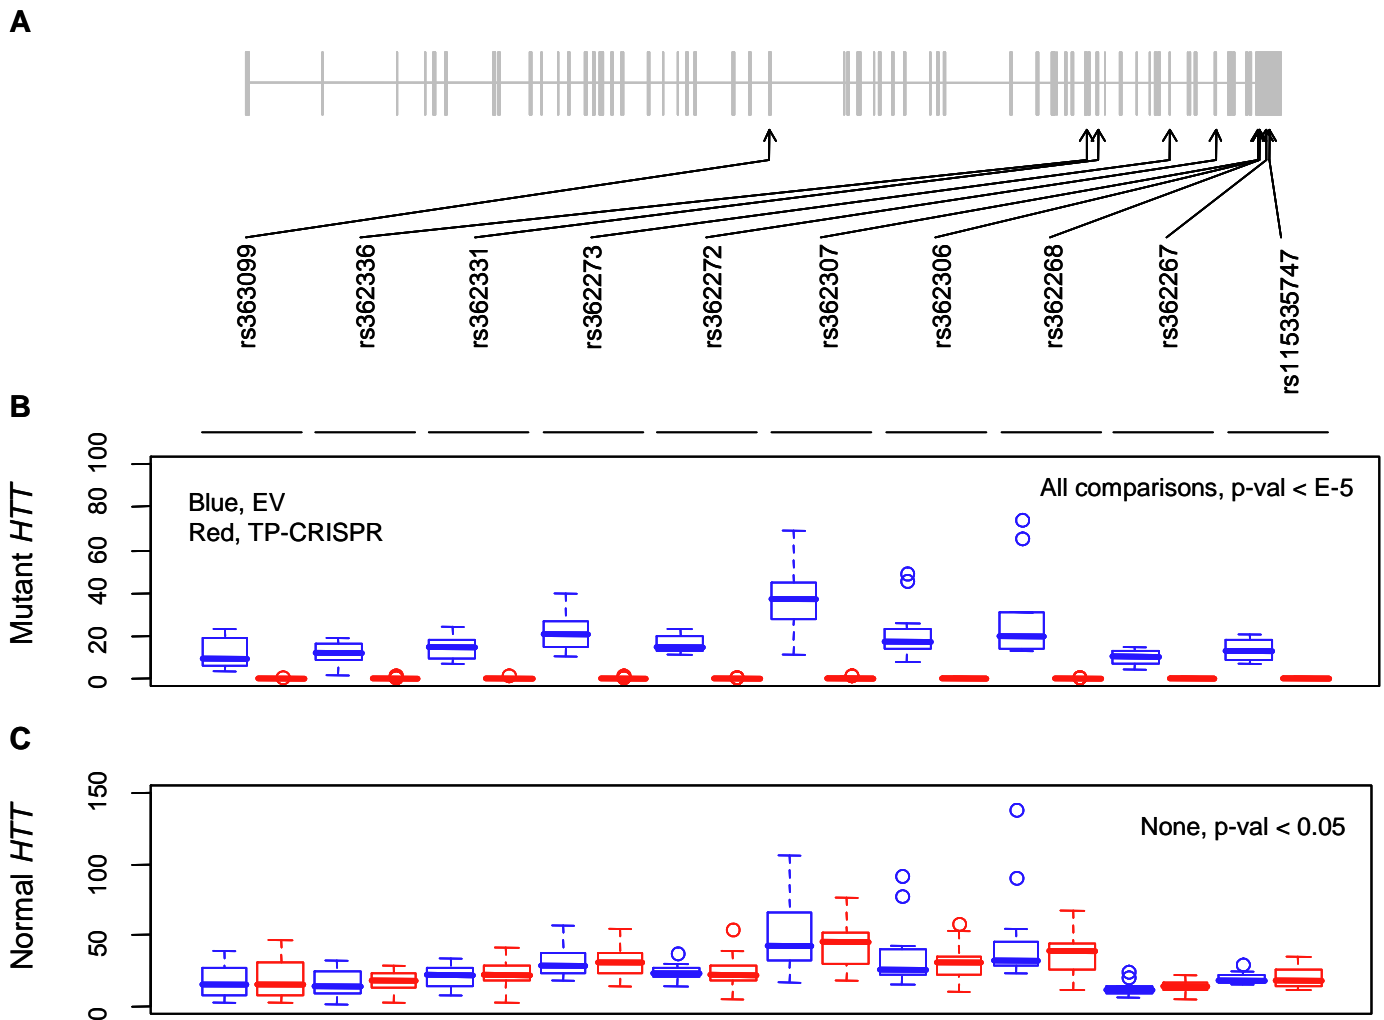

For allele-specific expression (ASE) analysis to determine the allele specificity of TP-CRISPR strategies, we counted alleles of 10 heterozygous exonic SNPs in our RNAseq data.

A) Locations of the 10 heterozygous exonic SNPs are shown relative to the RefSeq NM\_002111.

B) Counts of alleles for the 10 heterozygous exonic SNPs on the mutant *HTT* in the EV-treated clones (blue) and TP-CRISPR-targeted clones (red; L4-R4 and L4-R6 combinations) are summarized. All pairs showed nominal p-value < 1E-5 (Bonferroni corrected p-value < 0.05). N=12 for each blue box; N=20 for each red box.

B) The same analysis approach was applied to alleles of 10 heterozygous exonic SNPs that are on the normal *HTT*. Blue and red boxes represent alleles of normal *HTT* in the EV-treated and TP-CRISPR targeted clonal lines, respectively. None of the exonic SNP sites showed nominal p-value < 0.05. N=12 for each blue box; N=20 for each red box.

**Figure S6. DGE analysis of RNAseq data.**

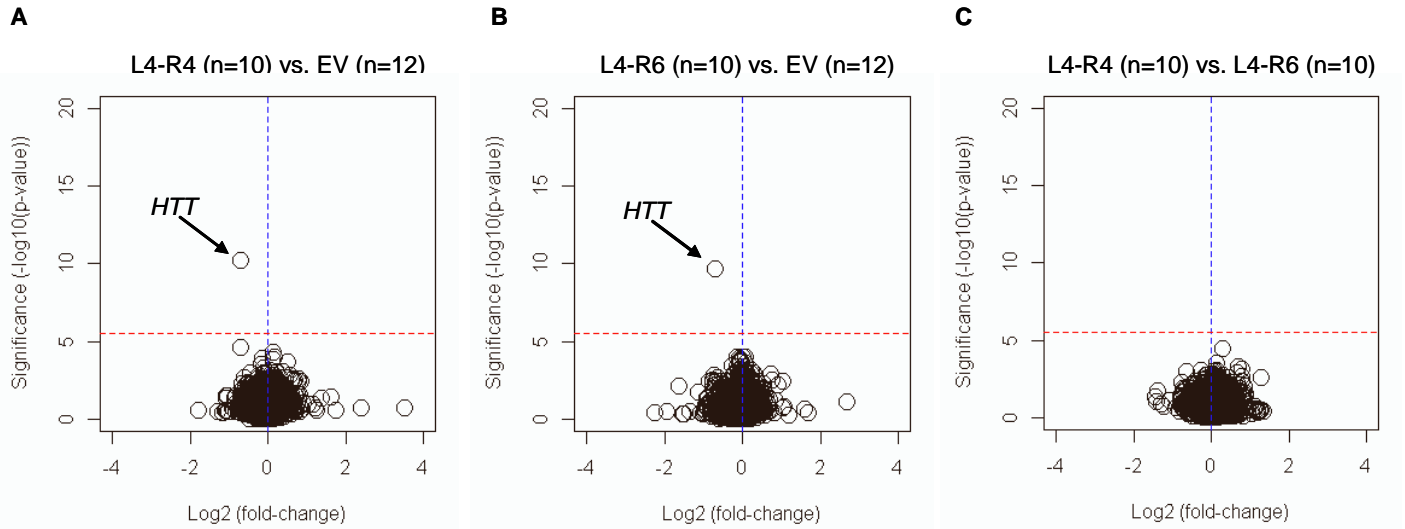

DGE analysis of RNAseq data was performed to identify significantly altered genes by TP-CRISPR strategies.

A) DGE analysis was performed by comparing 10 clones for L4-R4 combination to 12 EV-treated controls. A red horizontal and a blue vertical line represent Bonferroni-corrected significance and zero fold-change, respectively. No genes were significantly altered in TP-CRISPR targeted clonal lines except *HTT* (black arrow).

B) Similarly, DGE analysis was performed by comparing 10 clones for L4-R6 combination to 12 EV-treated clonal lines.

C) To determine whether L4-R4 combination produced different transcriptome changes compared to L4-R6 combination, we performed DGE analysis by comparing 10 clonal lines by L4-R combination to 10 clonal lines by L4-R6 combination, revealing zero significant genes by Bonferroni correction (red horizontal line).

**Figure S7. Power and sensitivity of our RNAseq analysis.**

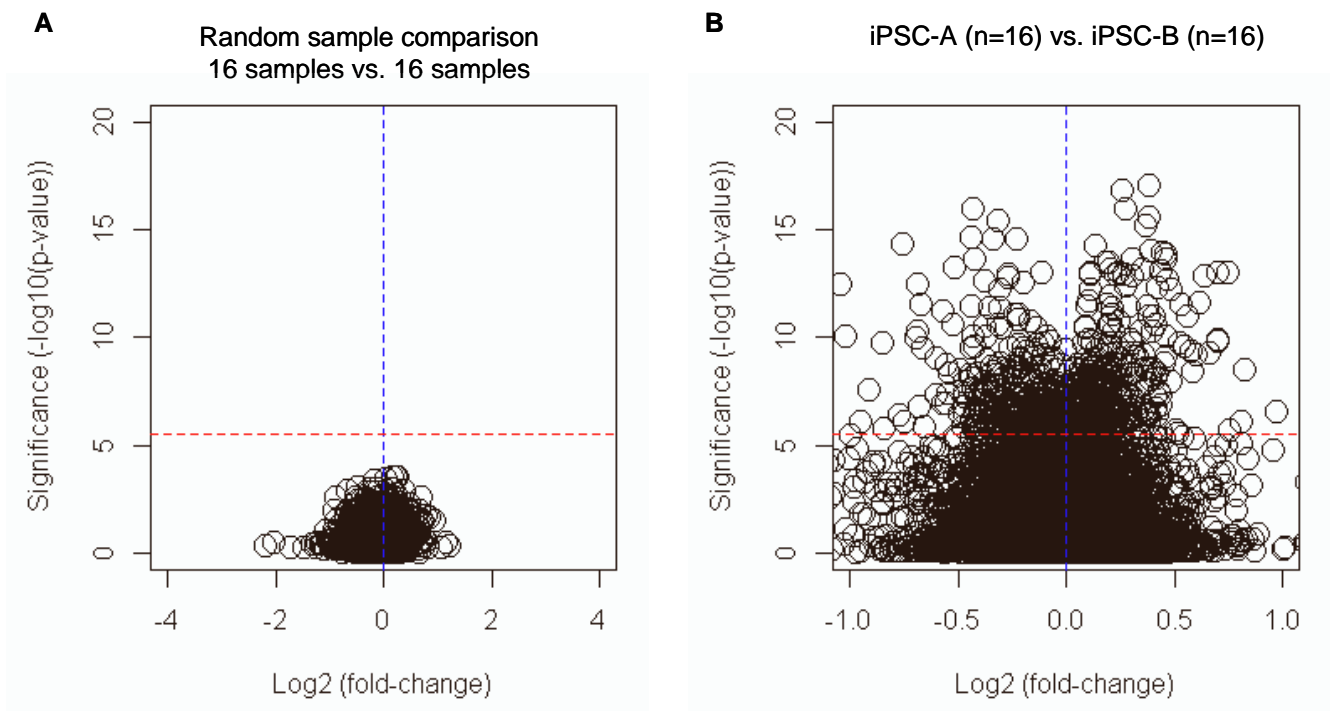

The shape of the volcano plot was atypical in our main DGE analysis (i.e., TP-CRISPR vs. EV), potentially due to the fact that only one gene is significantly altered.

A) To understand the reason behind the atypical shape of the volcano plot in our targeted clones vs. EV comparison, we generated two groups of randomly assigned samples and performed DGE analysis. Since samples are randomly mixed in two groups, we did not expect to see any significantly altered genes. The shapes of volcano plots for true sample comparison and random sample comparison were similar except for *HTT*. A red horizontal and a blue vertical line represent Bonferroni-corrected significance and zero fold change, respectively.

B) To judge whether our RNAseq study had sufficient power and sensitivity, we performed DGE analysis by comparing all 16 clonal lines from iPSC-A with 16 clonal lines from iPSC-B. Due to the different genetic background of two lines, many genes are predicted to be significantly different. The volcano plot focused on  $\log_2(\text{fold-change})$  -1 to 1 (X-axis) to highlight the levels of significance. By Bonferroni corrected p-value, 664 genes (above the red dotted line) were significantly different between two lines.
